# Supplementary material for: SWI/SNF Alterations in Squamous Bladder Cancers
Source: PubMed Central journal article supplement (PMC7699259; doi:10.3390/genes11111368), 2020-11-19
Supplement: genes-11-01368-s001.pdf [file genes-11-01368-s001.pdf]

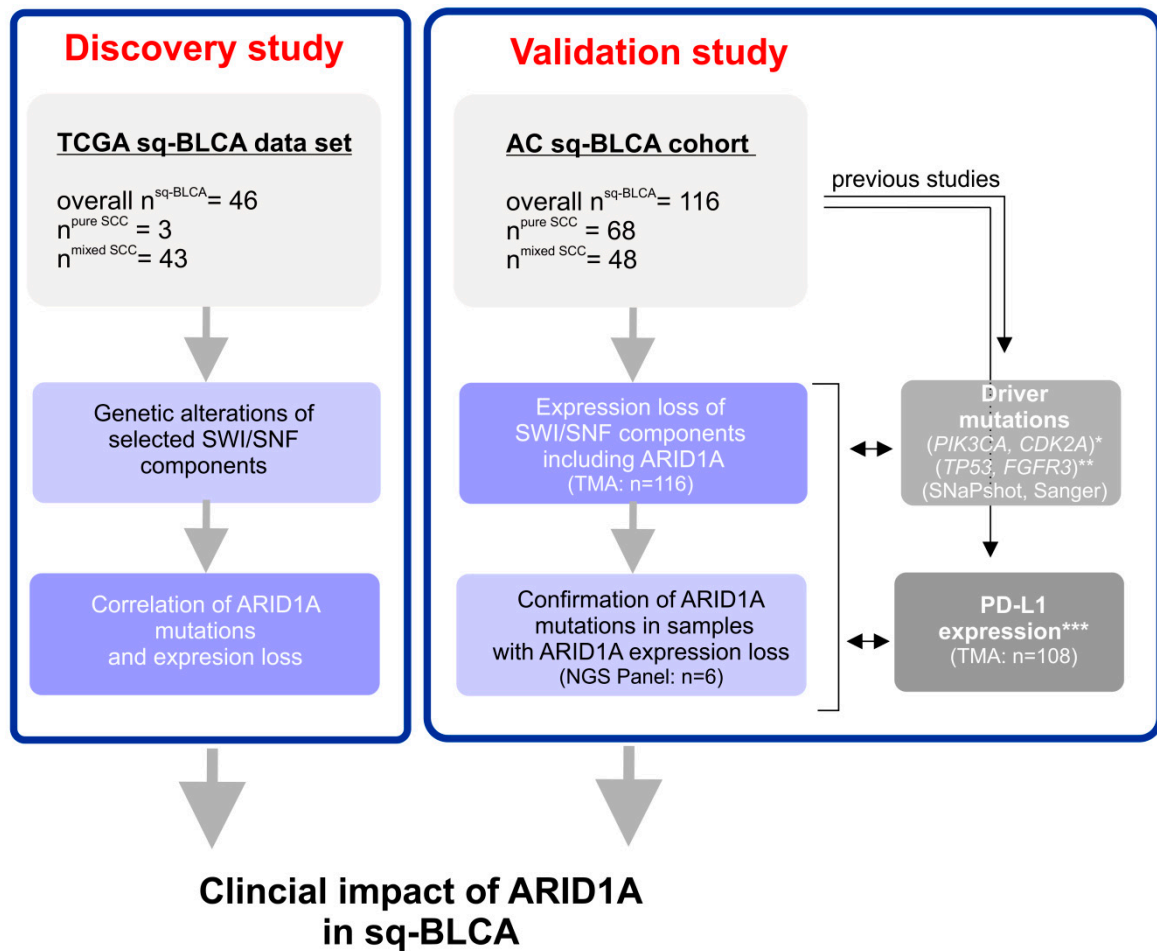

**Supplemental Figure 1: Study design of the project.** *Left box:* Discovery study. TCGA data sets of carcinomas with histologically squamous differentiation ( $n=3$  pure SCC and  $n=43$  MIX) were analyzed for genetic alterations of seven frequently affected subunits of the SWI/SNF complexes BAF and PBAF. In a second step *ARID1A* mutations were correlated with ARID1A protein expression. *Right box:* Validation study. Protein expression of seven SWI/SNF complex proteins (*ARID1A*, *SMARCA4*, *SMARCB1*, *SMARCC1*, *SMARCC2*, *SMARCA2* and *PBRM1*) was assessed by immunohistochemistry in our own sq-BLCA sample cohort. In a second step tumor samples with *ARID1A* expression loss (IRS0-2) underwent NGS panel sequencing for putative genetic alterations of the *ARID1A* gene. Finally, we analyzed whether a co-occurrence of *ARID1A* expression loss, genetic alterations and genetic driver mutations (*TP53* and *FGFR3* (\*Rose, M. et al. 2020 [5]); *PIK3CA* and *CDKN2A* (\*\*unpublished so far)) and PD-L1 expression (\*\*\*)Morsch, R. et al. 2020 [44]) could be found. In parallel, *ARID1A* expression loss and genetic alterations were used for both univariate Kaplan-Meier and correlation analysis with clinico-pathological characteristics, however, with no statistical significance.

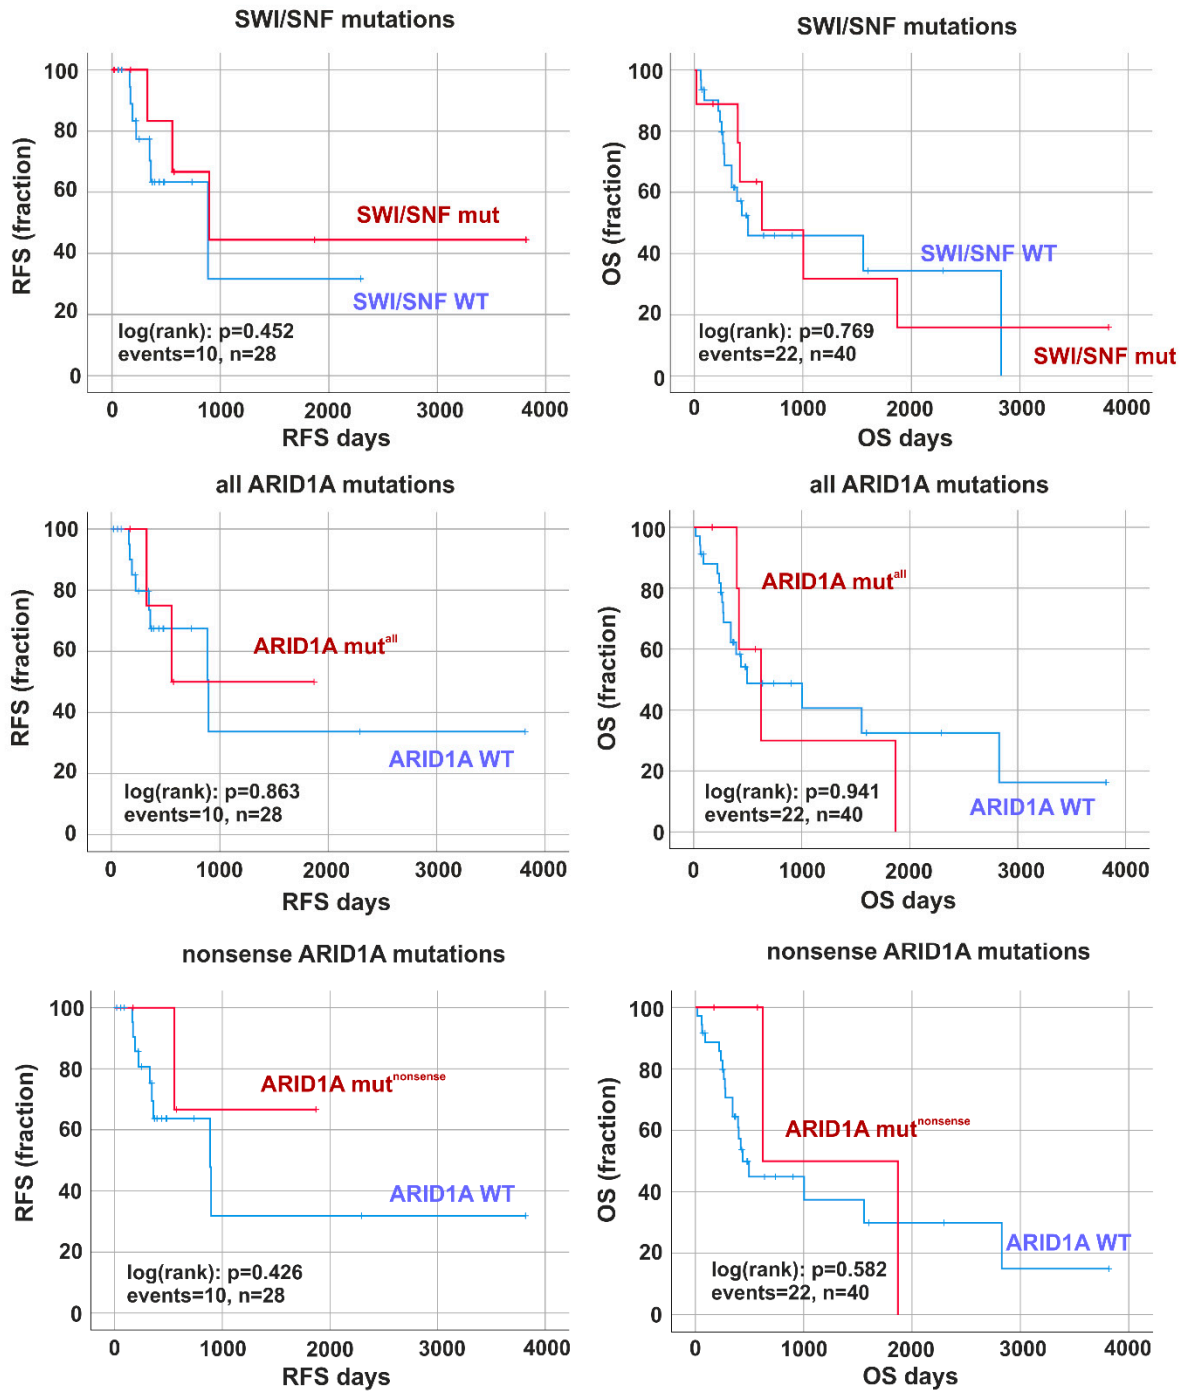

**Supplemental Figure 2: Prognostic impact of SWI/SNF and ARID1A mutations on tumor patients' survival.** Univariate survival analysis illustrates that tumors with at least a single mutation in one/or more analyzed SWI/SNF components (top row, red curve) or ARID1A mutations (all (middle row) or nonsense (bottom row), red curves) predict no significant shorter RFS / OS compared to the WT status (blue curves, respectively).

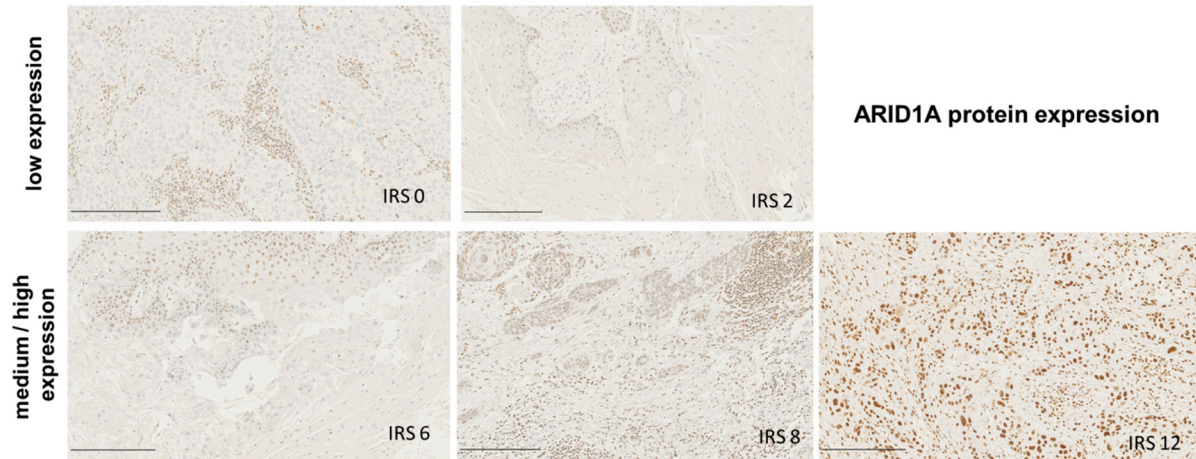

**Supplemental Figure 3: Immunohistochemical staining of ARID1A according to calculated IRS.**  
ARID1A staining is shown for IRS 0, 2, 6, 8 and 12 (Black scale bar: 250  $\mu$ M).

**Supplementary Table 1: Primer sequences for Sanger sequencing of FFPE Material.**

| Gene   | Primer sequence                | Annealing Temperature |
|--------|--------------------------------|-----------------------|
| TP53   |                                |                       |
| Exon 5 | 5'-TGCCGT CTTCCAGTTGCTTTATC-3' | 60°C                  |
|        | 5'-GCAATCAGTGAGGAATCAGAGGC-3'  |                       |
| Exon 6 | 5'-AGCAGCTGGGGCTGGAGAG-3'      | 63°C                  |
|        | 5'-CTGGAGGCCCACTGACAAC-3'      |                       |
| Exon 7 | 5'-CCAAGGCGCACTGGCCTCA-3'      | 63°C                  |
|        | 5'-AGAGGCAAGCAGAGGCTGG-3'      |                       |
| Exon 8 | 5'-CTGATTTCTTACTGCCTC-3'       | 60°C                  |
|        | 5'-CTGCACCCTTGGTCTCCTC-3'      |                       |
| Exon 9 | 5'-GTTATGCCTCAGATTCATT-3'      | 55°C                  |
|        | 5'-CGGCATTTTGAGTGTTAGAC-3'     |                       |
| CDKN2A |                                |                       |
| Exon 1 | 5'-GCTTCCTTTCCGTCATGC-3'       | 59°C                  |
|        | 5'-CAGGTACCGTGCGACATC-3'       |                       |
| Exon 2 | 5'-CTGTTCTCTCTGGCAGGTCA-3'     | 59°C                  |
|        | 5'-TGTGCTGGAAAATGAATCCT-3'     |                       |
| Exon 2 | 5'-CTTCCTGGACACGCTGGT-3'       | 59°C                  |
|        | 5'-TGGAGGCTCTCAGGGTACAAA-3'    |                       |

Supplementary Table 2: Clinico-pathological parameters of the TCGA sq-BLCA data set in relation to SWI/SNF mutations.

|                   | <i>n</i> <sup>a</sup> | SWI/SNF mutations <sup>b</sup> |          | P-value <sup>c</sup> |
|-------------------|-----------------------|--------------------------------|----------|----------------------|
|                   |                       | negative                       | positive |                      |
| <b>Parameter:</b> |                       |                                |          |                      |
| Tumor stage       |                       |                                |          |                      |
| pT2               | 13                    | 10                             | 3        | 0.876                |
| pT3-pT4           | 24                    | 19                             | 5        |                      |
| Lymph node status |                       |                                |          |                      |
| neg               | 26                    | 19                             | 7        | 0.281                |
| pos               | 10                    | 9                              | 1        |                      |

<sup>a</sup>Only patients of the TCGA platform with squamous histology were included;

<sup>b</sup>criteria: SWI/SNF mutation is defined if at least one genetic alteration (missense/nonsense) in one/or more of the analyzed components is present;

<sup>c</sup>Fisher's exact test

Supplementary Table 3: Clinico-pathological parameters of the TCGA sq-BLCA data set in relation to all identified *ARID1A* mutations.

|                   | <i>n</i> <sup>a</sup> | ARID1A mutations <sup>b</sup> |          | P-value <sup>c</sup> |
|-------------------|-----------------------|-------------------------------|----------|----------------------|
|                   |                       | negative                      | positive |                      |
| <b>Parameter:</b> |                       |                               |          |                      |
| Tumor stage       |                       |                               |          |                      |
| pT2               | 13                    | 11                            | 2        | 0.809                |
| pT3-pT4           | 24                    | 21                            | 3        |                      |
| Lymph node status |                       |                               |          |                      |
| neg               | 26                    | 22                            | 4        | 0.680                |
| pos               | 10                    | 9                             | 1        |                      |

<sup>a</sup>Only patients of the TCGA platform with squamous histology were included;

<sup>b</sup>criteria: genetic alterations of *ARID1A* independent of mutation type; <sup>c</sup>Fisher's exact test

Supplementary Table 4: Clinico-pathological parameters of the TCGA sq-BLCA data set in relation to nonsense *ARID1A* mutations.

|                   | <i>n</i> <sup>a</sup> | ARID1A mutations <sup>b</sup> |          | P-value <sup>c</sup> |
|-------------------|-----------------------|-------------------------------|----------|----------------------|
|                   |                       | negative                      | positive |                      |
| <b>Parameter:</b> |                       |                               |          |                      |
| Tumor stage       |                       |                               |          |                      |
| pT2               | 13                    | 11                            | 2        | 0.239                |
| pT3-pT4           | 24                    | 23                            | 1        |                      |
| Lymph node status |                       |                               |          |                      |
| neg               | 26                    | 24                            | 2        | 0.825                |
| pos               | 10                    | 9                             | 1        |                      |

<sup>a</sup>Only patients of the TCGA platform with squamous histology were included;

<sup>b</sup>criteria: Only nonsense *ARID1A* mutation were included; <sup>c</sup>Fisher's exact test

Supplementary Table 5: Overlap of ARID1A mutations / expression loss with PD-L1 expression.

|                                             | ARID1A mut/del | ARID1A exp (IRS≤2) |
|---------------------------------------------|----------------|--------------------|
| <b>PD-L1 scores for antibody clone 28-8</b> | <b>n</b>       | <b>n</b>           |
| <b>IC ≥ 5%<sup>a</sup></b>                  | 1/3            | 2/6                |
| <b>CPS ≥ 10<sup>b</sup></b>                 | 0/3            | 1/6                |

<sup>a</sup>atezolizumab , <sup>b</sup>pembrolizumab first line therapy requirement

---

**Supplementary Table 6: Abbreviation list**

---

|            |                                                                                                   |
|------------|---------------------------------------------------------------------------------------------------|
| AKT        | serine/threonine protein kinase B                                                                 |
| ARID1A     | AT-rich interactive domain-containing protein 1A                                                  |
| BAF        | BRG1/BRM associated factor                                                                        |
| BRG1       | alias symbol for SMARCA4                                                                          |
| BRM        | alias symbol for SMARCA2                                                                          |
| cBAF       | canonical BRG1/BRM associated factor                                                              |
| CDKN2A     | cyclin dependent kinase inhibitor 2A                                                              |
| CNV        | copy number variation                                                                             |
| COSMIC     | Catalogue Of Somatic Mutations In Cancer                                                          |
| CPS        | Combined Positivity Score                                                                         |
| CXCL13     | C-X-C motif chemokine ligand 13                                                                   |
| dbSNP      | Single Nucleotide Polymorphism Database                                                           |
| DNA        | Deoxyribonucleic acid                                                                             |
| DSB        | double strand break                                                                               |
| EMA        | European Medicines Agency                                                                         |
| F.A.       | Fabian Achenbach                                                                                  |
| FFPE       | formalin-fixed paraffin-embedded                                                                  |
| FGFR3      | fibroblast growth factor receptor 3                                                               |
| HDAC6      | histone deacetylase 6                                                                             |
| H&E        | hematoxylin and eosin stain                                                                       |
| HGNC       | HUGO Gene Nomenclature Committee (HUGO: Human Genome Organisation)                                |
| ICI        | immune checkpoint inhibitor                                                                       |
| IC(-score) | immune cell score                                                                                 |
| ID         | identification                                                                                    |
| IRS        | Immune Reactive Score                                                                             |
| MUT        | mutated                                                                                           |
| ncBAF      | non-canonical BRG1/BRM associated factor                                                          |
| NGS        | next generation sequencing                                                                        |
| NOS        | not otherwise specified                                                                           |
| N.T.G.     | Nadine Therese Gaisa                                                                              |
| PBAF       | polybromo-associated BRG1/BRM associated factor                                                   |
| PBRM1      | Protein polybromo-1                                                                               |
| PCR        | polymerase chain reaction                                                                         |
| PD-L1      | Programmed death-ligand 1                                                                         |
| PIK3CA     | phosphatidylinositol-4,5-bisphosphate 3-kinase catalytic subunit alpha                            |
| RWTH       | Rheinisch-Westfälische Technische Hochschule                                                      |
| SCC        | squamous cell carcinoma                                                                           |
| SMARCA2    | SWI/SNF related, matrix associated, actin dependent regulator of chromatin, subfamily a, member 2 |
| SMARCA4    | SWI/SNF related, matrix associated, actin dependent regulator of chromatin, subfamily a, member 4 |
| SMARCB1    | SWI/SNF related, matrix associated, actin dependent regulator of chromatin, subfamily b, member 1 |
| SMARCC1    | SWI/SNF related, matrix associated, actin dependent regulator of chromatin, subfamily c, member 1 |
| SMARCC2    | SWI/SNF related, matrix associated, actin dependent regulator of chromatin, subfamily c, member 2 |
| SPSS       | Statistical Package for the Social Sciences                                                       |
| sq-BLCA    | squamous (differentiated) bladder cancer                                                          |
| SWI/SNF    | SWItch/Sucrose Non-Fermentable                                                                    |
| TCGA       | The Cancer Genome Atlas                                                                           |
| TMA        | Tissue microarrays                                                                                |
| TP53       | tumor protein p53                                                                                 |
| UTR        | untranslated region                                                                               |
| WHO        | World Health Organization                                                                         |
| WT         | wildtype                                                                                          |

---
